# Supplementary material
Source: PubMed Central journal article supplement (PMC100320)
Supplement: 1471-2156-3-3-S1.pdf [file 1471-2156-3-3-S1.pdf]

Table 2: Two-point linkage data between CFEOM1 and the *FEOM1* locus

| Family and Locus | $\theta =$  |       |      |      |      |      |      |
|------------------|-------------|-------|------|------|------|------|------|
|                  | 0.00        | 0.01  | 0.05 | 0.10 | 0.20 | 0.30 | 0.40 |
| <b>BJ</b>        |             |       |      |      |      |      |      |
| D12S1584         | 0.60        | 0.59  | 0.54 | 0.47 | 0.32 | 0.17 | 0.05 |
| D12S345          | 1.03        | 1.04  | 1.07 | 1.05 | 0.92 | 0.70 | 0.40 |
| D12S59           | <b>3.01</b> | 2.96  | 2.77 | 2.51 | 1.95 | 1.32 | 0.65 |
| D12S2080         | 0.60        | 0.59  | 0.54 | 0.47 | 0.32 | 0.17 | 0.05 |
| D12S1048         | 3.01        | 2.96  | 2.77 | 2.51 | 1.95 | 1.32 | 0.65 |
| D12S1668         | - $\infty$  | -0.22 | 0.39 | 0.58 | 0.62 | 0.51 | 0.30 |
| D12S1090         | - $\infty$  | 0.97  | 1.49 | 1.55 | 1.34 | 0.95 | 0.47 |
| <b>CZ</b>        |             |       |      |      |      |      |      |
| D12S1648         | 3.01        | 2.96  | 2.77 | 2.51 | 1.95 | 1.32 | 0.65 |
| D12S1584         | 2.11        | 2.08  | 1.95 | 1.79 | 1.43 | 1.02 | 0.55 |
| D12S345          | <b>3.01</b> | 2.96  | 2.77 | 2.51 | 1.95 | 1.32 | 0.65 |
| D12S59           | 3.01        | 2.96  | 2.77 | 2.51 | 1.95 | 1.32 | 0.65 |
| D12S2080         | 0.51        | 0.50  | 0.45 | 0.39 | 0.26 | 0.13 | 0.04 |
| D12S1048         | 2.62        | 2.57  | 2.38 | 2.13 | 1.59 | 1.02 | 0.45 |
| D12S1668         | 2.11        | 2.08  | 1.95 | 1.79 | 1.43 | 1.02 | 0.55 |
| <b>AG</b>        |             |       |      |      |      |      |      |
| D12S1584         | 0.60        | 0.59  | 0.54 | 0.47 | 0.32 | 0.17 | 0.05 |
| D12S345          | 1.51        | 1.48  | 1.37 | 1.23 | 0.93 | 0.61 | 0.29 |
| D12S2080         | 1.20        | 1.18  | 1.09 | 0.98 | 0.73 | 0.46 | 0.21 |
| D12S1048         | <b>1.81</b> | 1.78  | 1.65 | 1.49 | 1.13 | 0.75 | 0.37 |
| D12S1668         | 0.00        | 0.00  | 0.00 | 0.00 | 0.00 | 0.00 | 0.00 |
| D12S1090         | - $\infty$  | -0.22 | 0.37 | 0.53 | 0.53 | 0.39 | 0.19 |
| <b>AJ</b>        |             |       |      |      |      |      |      |
| D12S1584         | 1.20        | 1.28  | 1.09 | 0.98 | 0.75 | 0.50 | 0.25 |
| D12S345          | 1.20        | 1.18  | 1.09 | 0.98 | 0.75 | 0.50 | 0.25 |
| D12S2080         | 0.90        | 0.89  | 0.84 | 0.77 | 0.61 | 0.44 | 0.24 |
| D12S1048         | <b>1.20</b> | 1.18  | 1.09 | 0.98 | 0.75 | 0.50 | 0.25 |
| D12S1668         | 0.60        | 0.59  | 0.56 | 0.51 | 0.41 | 0.29 | 0.16 |
| D12S1090         | 0.12        | 0.19  | 0.33 | 0.39 | 0.39 | 0.29 | 0.16 |
| <b>AH</b>        |             |       |      |      |      |      |      |
| D12S1584         | 0.56        | 0.54  | 0.48 | 0.39 | 0.23 | 0.10 | 0.02 |
| D12S345          | 0.86        | 0.84  | 0.75 | 0.64 | 0.43 | 0.22 | 0.06 |
| D12S59           | <b>0.86</b> | 0.84  | 0.75 | 0.64 | 0.43 | 0.22 | 0.06 |
| D12S2080         | 0.56        | 0.54  | 0.48 | 0.39 | 0.23 | 0.10 | 0.02 |
| D12S1048         | 0.26        | 0.25  | 0.22 | 0.18 | 0.11 | 0.05 | 0.01 |
| D12S1668         | 0.26        | 0.25  | 0.22 | 0.18 | 0.11 | 0.05 | 0.01 |
| D12S1090         | 0.82        | 0.80  | 0.72 | 0.61 | 0.39 | 0.19 | 0.05 |
| <b>T</b>         |             |       |      |      |      |      |      |
| D12S61           | 0.30        | 0.29  | 0.26 | 0.21 | 0.13 | 0.06 | 0.02 |
| D12S1584         | 0.00        | 0.00  | 0.00 | 0.00 | 0.00 | 0.00 | 0.00 |
| D12S345          | <b>0.30</b> | 0.29  | 0.26 | 0.21 | 0.13 | 0.06 | 0.02 |
| D12S2080         | 0.30        | 0.29  | 0.26 | 0.21 | 0.13 | 0.06 | 0.02 |

|          |      |      |      |      |      |      |      |
|----------|------|------|------|------|------|------|------|
| D12S1048 | 0.30 | 0.29 | 0.26 | 0.21 | 0.13 | 0.06 | 0.02 |
| D12S1668 | 0.00 | 0.00 | 0.00 | 0.00 | 0.00 | 0.00 | 0.00 |

**BC**

|          |             |      |      |      |      |      |      |
|----------|-------------|------|------|------|------|------|------|
| D12S1584 | 0.30        | 0.29 | 0.26 | 0.21 | 0.13 | 0.06 | 0.02 |
| D12S345  | <b>0.30</b> | 0.29 | 0.26 | 0.21 | 0.13 | 0.06 | 0.02 |
| D12S2080 | 0.00        | 0.00 | 0.00 | 0.00 | 0.00 | 0.00 | 0.00 |
| D12S1048 | 0.30        | 0.29 | 0.26 | 0.21 | 0.13 | 0.06 | 0.02 |
| D12S1668 | 0.00        | 0.00 | 0.00 | 0.00 | 0.00 | 0.00 | 0.00 |

**CT**

|          |             |      |      |      |      |      |      |
|----------|-------------|------|------|------|------|------|------|
| D12S1584 | <b>0.30</b> | 0.29 | 0.26 | 0.21 | 0.13 | 0.06 | 0.02 |
| D12S345  | 0.00        | 0.00 | 0.00 | 0.00 | 0.00 | 0.00 | 0.00 |
| D12S2080 | 0.00        | 0.00 | 0.00 | 0.00 | 0.00 | 0.00 | 0.00 |
| D12S1048 | 0.00        | 0.00 | 0.00 | 0.00 | 0.00 | 0.00 | 0.00 |
| D12S1668 | 0.00        | 0.00 | 0.00 | 0.00 | 0.00 | 0.00 | 0.00 |
| D12S1090 | 0.30        | 0.29 | 0.26 | 0.21 | 0.13 | 0.06 | 0.02 |

**E**

|          |             |      |      |      |      |      |      |
|----------|-------------|------|------|------|------|------|------|
| D12S1648 | 0.26        | 0.26 | 0.22 | 0.19 | 0.11 | 0.05 | 0.01 |
| D12S61   | 0.60        | 0.59 | 0.56 | 0.51 | 0.41 | 0.29 | 0.16 |
| D12S1584 | 0.00        | 0.00 | 0.00 | 0.00 | 0.00 | 0.00 | 0.00 |
| D12S345  | <b>0.60</b> | 0.59 | 0.56 | 0.51 | 0.41 | 0.29 | 0.16 |
| D12S59   | 0.60        | 0.59 | 0.56 | 0.51 | 0.41 | 0.29 | 0.16 |
| D12S2080 | 0.60        | 0.59 | 0.56 | 0.51 | 0.41 | 0.29 | 0.16 |
| D12S1048 | 0.60        | 0.59 | 0.56 | 0.51 | 0.41 | 0.29 | 0.16 |
| D12S1668 | 0.60        | 0.59 | 0.56 | 0.51 | 0.41 | 0.29 | 0.16 |

**K**

|          |              |       |       |       |       |       |       |
|----------|--------------|-------|-------|-------|-------|-------|-------|
| D12S1584 | 0.00         | 0.00  | 0.00  | 0.00  | 0.00  | 0.00  | 0.00  |
| D12S345  | 0.00         | 0.00  | 0.00  | 0.00  | 0.00  | 0.00  | 0.00  |
| D12S59   | <b>-5.40</b> | -1.40 | -0.72 | -0.44 | -0.19 | -0.08 | -0.02 |
| D12S2080 | -0.78        | -0.70 | -0.49 | -0.33 | -0.15 | -0.06 | -0.01 |
| D12S1048 | 0.00         | 0.00  | 0.00  | 0.00  | 0.00  | 0.00  | 0.00  |
| D12S1668 | 0.00         | 0.00  | 0.00  | 0.00  | 0.00  | 0.00  | 0.00  |
| D12S1090 | -5.40        | -1.40 | -0.72 | -0.44 | -0.19 | -0.08 | -0.02 |

**BT**

|          |       |       |       |       |       |       |       |
|----------|-------|-------|-------|-------|-------|-------|-------|
| D12S1584 | 0.30  | 0.29  | 0.24  | 0.18  | 0.08  | 0.03  | 0.00  |
| D12S1621 | -∞    | -3.10 | -1.72 | -1.14 | -0.59 | -0.30 | -0.11 |
| D12S345  | -5.70 | -1.40 | -0.72 | -0.44 | -0.19 | -0.08 | -0.02 |
| D12S59   | -∞    | -3.10 | -1.72 | -1.14 | -0.59 | -0.30 | -0.11 |
| D12S2080 | -∞    | -1.70 | -1.00 | -0.70 | -0.40 | -0.22 | -0.10 |
| D12S1048 | -5.70 | -1.40 | -0.72 | -0.44 | -0.19 | -0.08 | -0.02 |
| D12S1668 | -∞    | -3.10 | -1.72 | -1.14 | -0.59 | -0.30 | -0.11 |
