# Supplementary material
Source: PubMed Central journal article supplement (PMC100320)
Supplement: 1471-2156-3-3-S2.pdf [file 1471-2156-3-3-S2.pdf]

Table 3: Two-point linkage data between CFEOM1 and the *FEOM3* locus

| Family and Locus | $\theta =$ |       |       |       |       |       |       |
|------------------|------------|-------|-------|-------|-------|-------|-------|
|                  | 0.00       | 0.01  | 0.05  | 0.10  | 0.20  | 0.30  | 0.40  |
| <b>AG</b>        |            |       |       |       |       |       |       |
| D16S498          | -∞         | -2.51 | -1.18 | -0.67 | -0.25 | -0.09 | -0.02 |
| D16S486          | -∞         | -1.11 | -0.44 | -0.19 | 0.01  | 0.07  | 0.06  |
| D16S3063         | -∞         | -2.63 | -1.29 | -0.76 | -0.30 | -0.10 | -0.02 |
| D16S3407         | 0.90       | 0.89  | 0.81  | 0.72  | 0.52  | 0.32  | 0.13  |
| <b>AJ</b>        |            |       |       |       |       |       |       |
| D16S498          | 0.30       | 0.29  | 0.26  | 0.21  | 0.13  | 0.06  | 0.02  |
| D16S2621         | -∞         | -1.11 | -0.46 | -0.23 | -0.06 | -0.01 | 0.00  |
| D16S3407         | -∞         | -0.81 | -0.18 | 0.03  | 0.14  | 0.13  | 0.08  |
| <b>AH</b>        |            |       |       |       |       |       |       |
| D16S498          | 0.26       | 0.25  | 0.22  | 0.18  | 0.11  | 0.05  | 0.01  |
| D16S3077         | -5.70      | -1.40 | -0.72 | -0.44 | -0.19 | -0.08 | -0.02 |
| D16S486          | -7.48      | -1.15 | -0.50 | -0.26 | -0.08 | -0.02 | 0.00  |
| D16S476          | -5.70      | -1.24 | -0.58 | -0.32 | -0.11 | -0.03 | 0.00  |
| D16S3063         | 0.26       | 0.25  | 0.20  | 0.15  | 0.07  | 0.02  | 0.00  |
| <b>D16S3028</b>  | -5.40      | -1.11 | -0.45 | -0.21 | -0.03 | 0.01  | 0.01  |
| <b>D16S689</b>   | -6.18      | -1.83 | -1.00 | -0.61 | -0.25 | -0.09 | -0.02 |
| <b>T</b>         |            |       |       |       |       |       |       |
| D16S498          | -∞         | -1.40 | -0.72 | -0.44 | -0.19 | -0.08 | -0.02 |
| D16S3077         | 0.30       | 0.29  | 0.26  | 0.21  | 0.13  | 0.06  | 0.02  |
| D16S486          | -∞         | -1.40 | -0.72 | -0.44 | -0.19 | -0.08 | -0.02 |
| D16S476          | -∞         | -1.40 | -0.72 | -0.44 | -0.19 | -0.08 | -0.02 |
| D16S3063         | -∞         | -1.40 | -0.72 | -0.44 | -0.19 | -0.08 | -0.02 |
| <b>BC</b>        |            |       |       |       |       |       |       |
| D16S498          | -5.70      | -1.40 | -0.72 | -0.44 | -0.19 | -0.08 | -0.02 |
| D16S3063         | -5.70      | -1.40 | -0.72 | -0.44 | -0.19 | -0.08 | -0.02 |
| D16S2621         | -5.70      | -1.40 | -0.72 | -0.44 | -0.19 | -0.08 | -0.02 |
| <b>CT</b>        |            |       |       |       |       |       |       |
| D16S498          | 0.30       | 0.29  | 0.26  | 0.21  | 0.13  | 0.06  | 0.02  |
| D16S476          | -∞         | -1.40 | -0.72 | -0.44 | -0.19 | -0.08 | -0.02 |
| D16S2621         | -∞         | -1.40 | -0.72 | -0.44 | -0.19 | -0.08 | -0.02 |
| D16S3407         | -∞         | -1.40 | -0.72 | -0.44 | -0.19 | -0.08 | -0.02 |
| <b>E</b>         |            |       |       |       |       |       |       |
| D16S486          | 0.30       | 0.30  | 0.28  | 0.26  | 0.20  | 0.15  | 0.08  |
| D16S476          | 0.60       | 0.59  | 0.56  | 0.51  | 0.41  | 0.29  | 0.16  |
| D16S2621         | 0.30       | 0.29  | 0.26  | 0.21  | 0.13  | 0.06  | 0.02  |
| D16S3407         | 0.60       | 0.59  | 0.56  | 0.51  | 0.41  | 0.29  | 0.16  |
| <b>K</b>         |            |       |       |       |       |       |       |
| D16S3077         | 0.30       | 0.29  | 0.26  | 0.21  | 0.13  | 0.06  | 0.02  |
| D16S3063         | 0.30       | 0.29  | 0.26  | 0.21  | 0.13  | 0.06  | 0.02  |
| <b>BT</b>        |            |       |       |       |       |       |       |
| D16S539          | 0.60       | 0.59  | 0.54  | 0.47  | 0.34  | 0.21  | 0.10  |
| D16S486          | 0.60       | 0.59  | 0.54  | 0.47  | 0.34  | 0.21  | 0.10  |
| D16S689          | 0.60       | 0.59  | 0.54  | 0.47  | 0.34  | 0.21  | 0.10  |
| D16S303          | 0.60       | 0.59  | 0.54  | 0.47  | 0.34  | 0.21  | 0.10  |
