# Supplementary material
Source: PubMed Central journal article supplement (PMC100320)
Supplement: 1471-2156-3-3-S3.pdf [file 1471-2156-3-3-S3.pdf]

Table 4: Two-point linkage data between CFEOM1 and the *FEOM2* locus

| Family and Locus | $\theta =$ |       |       |       |       |       |       |
|------------------|------------|-------|-------|-------|-------|-------|-------|
|                  | 0.00       | 0.01  | 0.05  | 0.10  | 0.20  | 0.30  | 0.40  |
| <b>AG</b>        |            |       |       |       |       |       |       |
| D11S4196         | $-\infty$  | -1.40 | -0.72 | -0.44 | -0.19 | -0.08 | -0.02 |
| D11S1314         | $-\infty$  | -6.20 | -3.44 | -2.29 | -1.18 | -0.60 | -0.23 |
| D11S1369         | 0.00       | 0.00  | 0.00  | 0.00  | 0.00  | 0.00  | 0.00  |
| <b>AJ</b>        |            |       |       |       |       |       |       |
| D11S4162         | 0.00       | 0.00  | 0.00  | 0.00  | 0.00  | 0.00  | 0.00  |
| D11S1314         | -5.88      | -1.51 | -0.65 | -0.26 | 0.06  | 0.15  | 0.13  |
| D11S1369         | $-\infty$  | -2.21 | -0.88 | -0.38 | 0.02  | 0.14  | 0.12  |
| <b>AH</b>        |            |       |       |       |       |       |       |
| D11S4162         | 0.26       | 0.25  | 0.22  | 0.18  | 0.11  | 0.05  | 0.01  |
| D11S1314         | $-\infty$  | -1.15 | -0.50 | -0.26 | -0.08 | -0.02 | 0.00  |
| D11S1369         | $-\infty$  | -1.15 | -0.50 | -0.26 | -0.08 | -0.02 | 0.00  |
| <b>T</b>         |            |       |       |       |       |       |       |
| D11S4162         | $-\infty$  | -1.40 | -0.72 | -0.44 | -0.19 | -0.08 | -0.02 |
| D11S1314         | $-\infty$  | -1.40 | -0.72 | -0.44 | -0.19 | -0.08 | -0.02 |
| D11S1369         | 0.00       | 0.00  | 0.00  | 0.00  | 0.00  | 0.00  | 0.00  |
| <b>BC</b>        |            |       |       |       |       |       |       |
| D11S4196         | 0.30       | 0.29  | 0.26  | 0.21  | 0.13  | 0.06  | 0.02  |
| D11S4162         | 0.30       | 0.29  | 0.26  | 0.21  | 0.13  | 0.06  | 0.02  |
| D11S1314         | 0.30       | 0.29  | 0.26  | 0.21  | 0.13  | 0.06  | 0.02  |
| D11S1369         | 0.00       | 0.00  | 0.00  | 0.00  | 0.00  | 0.00  | 0.00  |
| <b>CT</b>        |            |       |       |       |       |       |       |
| D11S4162         | 0.00       | 0.00  | 0.00  | 0.00  | 0.00  | 0.00  | 0.00  |
| D11S1314         | $-\infty$  | 1.40  | -0.72 | -0.44 | -0.19 | -0.08 | -0.02 |
| D11S1369         | 0.00       | 0.00  | 0.00  | 0.00  | 0.00  | 0.00  | 0.00  |
| <b>E</b>         |            |       |       |       |       |       |       |
| D11S4162         | 0.26       | 0.26  | 0.22  | 0.19  | 0.11  | 0.05  | 0.01  |
| D11S1314         | $-\infty$  | -1.70 | -1.00 | -0.70 | -0.40 | -0.22 | -0.10 |
| D11S1369         | $-\infty$  | -3.40 | -2.00 | -1.40 | -0.80 | -0.44 | -0.19 |
| <b>K</b>         |            |       |       |       |       |       |       |
| D11S4196         | 0.30       | 0.29  | 0.26  | 0.21  | 0.13  | 0.06  | 0.02  |
| D11S4162         | 0.00       | 0.00  | 0.00  | 0.00  | 0.00  | 0.00  | 0.00  |
| D11S1314         | 0.30       | 0.29  | 0.26  | 0.21  | 0.13  | 0.06  | 0.02  |
| D11S1369         | 0.00       | 0.00  | 0.00  | 0.00  | 0.00  | 0.00  | 0.00  |
| <b>BT</b>        |            |       |       |       |       |       |       |
| D11S4196         | -5.40      | -1.11 | -0.44 | -0.19 | 0.01  | 0.07  | 0.06  |
| D11S1314         | -5.40      | -1.11 | -0.44 | -0.19 | 0.01  | 0.07  | 0.06  |
| D11S1369         | 0.30       | 0.30  | 0.28  | 0.26  | 0.20  | 0.15  | 0.08  |
